# Supplementary material
Source: PubMed Central journal article supplement (PMC6150604)

**FIGURE S1**

**A**

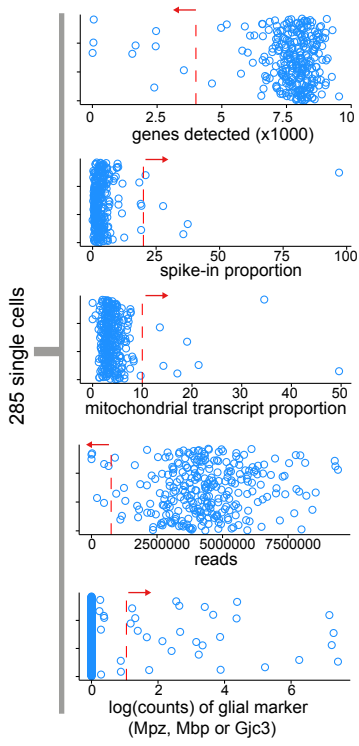

226 single cells

|         |    |                              |
|---------|----|------------------------------|
| Type I  | 50 | Wildtype                     |
| Apex    | 88 |                              |
| Middle  | 41 |                              |
| Type II | 7  | <i>Vglut3</i> <sup>-/-</sup> |
| Type I  | 40 |                              |

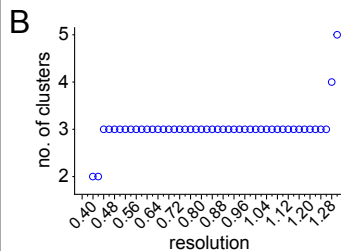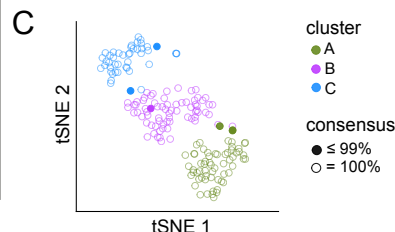

**D**

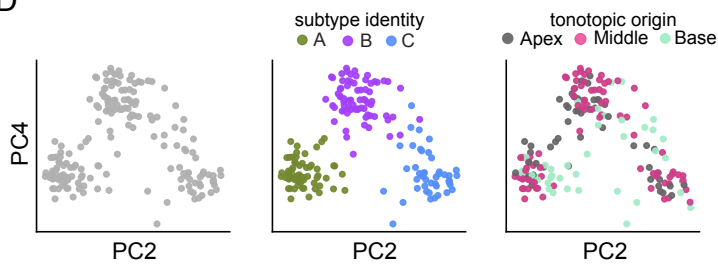

**E**

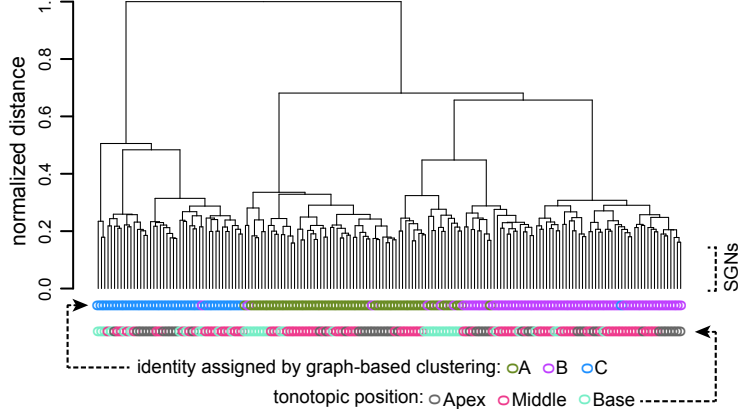

**F**

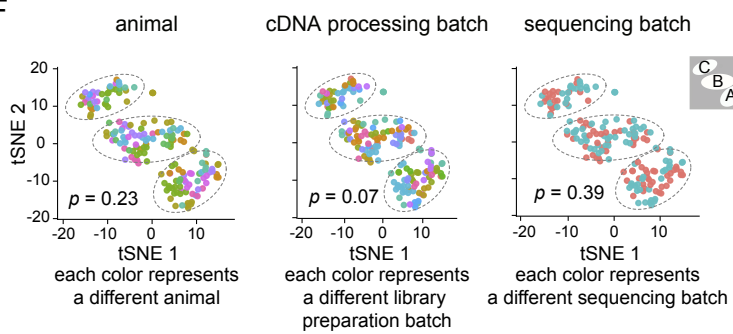

**G**

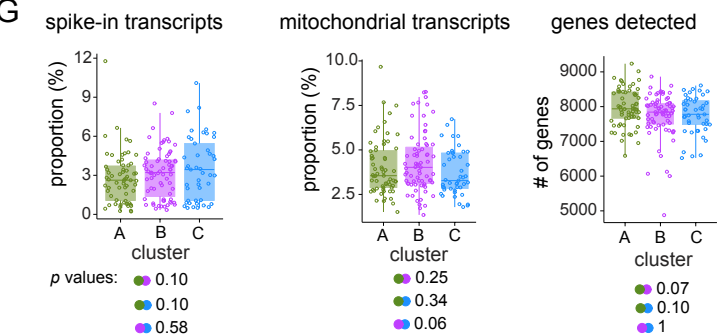

**H**

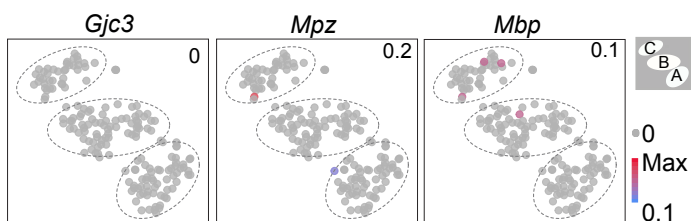

**I**

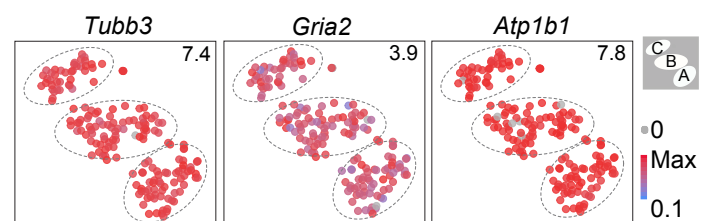

**J**

**Gene Ontology analysis : Type I vs. II SGNs**

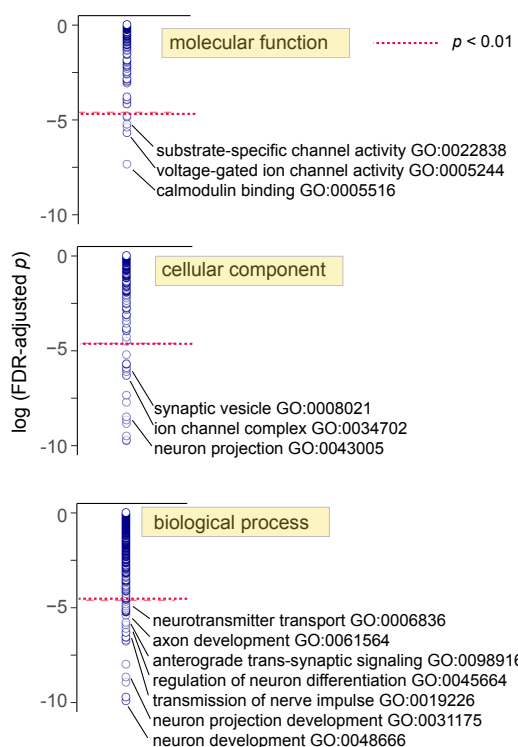

**K**

**Gene Ontology analysis: Ia, Ib, Ic SGNs**

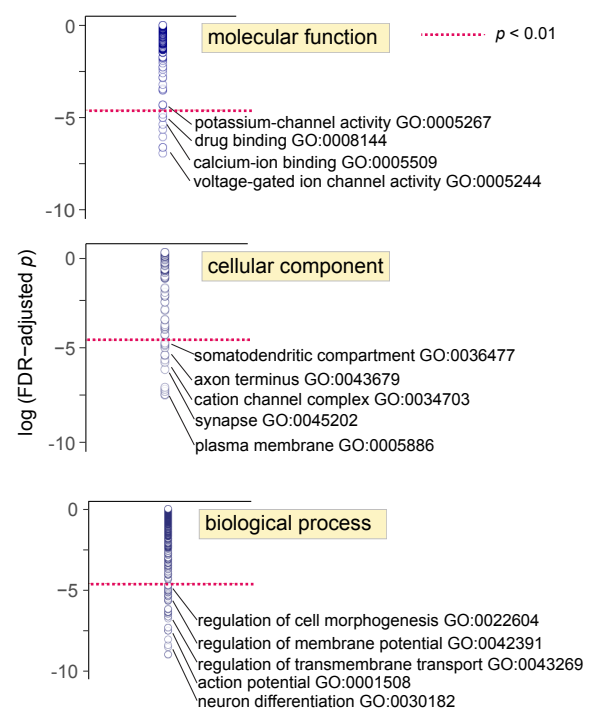

Supplement: NIHMS1502201-supplement-1.pdf [file NIHMS1502201-supplement-1.pdf]
