# Supplementary material
Source: PubMed Central journal article supplement (PMC6150604)
Supplement: NIHMS1502201-supplement-6.pdf [file NIHMS1502201-supplement-6.pdf]

# FIGURE S6

Original RNAscope z-stack

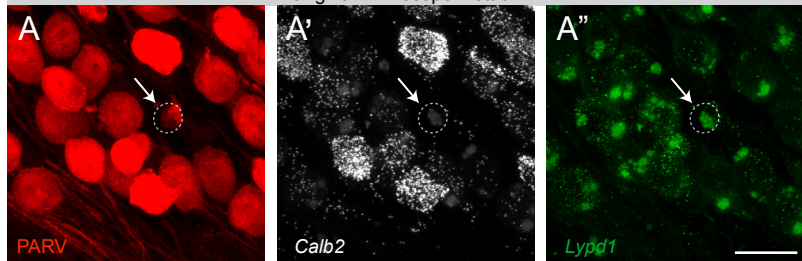

After Gaussian Filter on RNAscope Channels

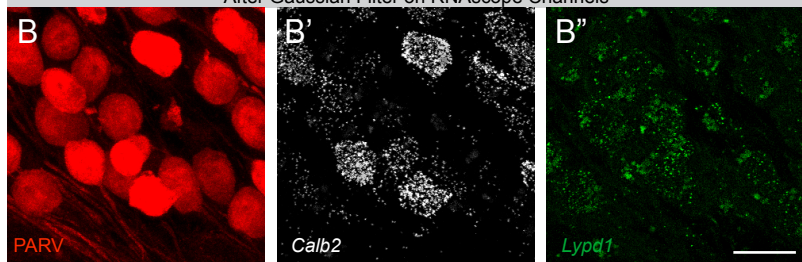

**C**

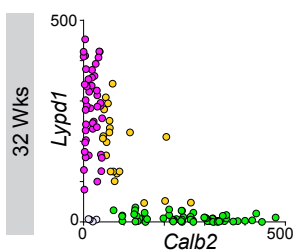

**D**

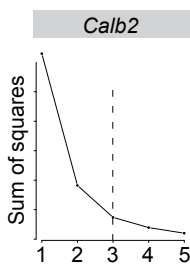

**E**

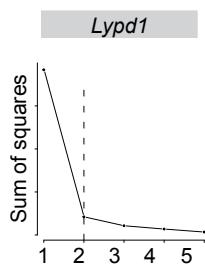

64 Wks

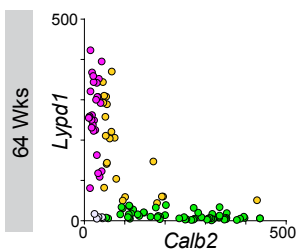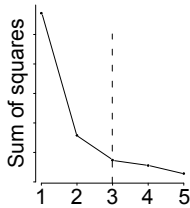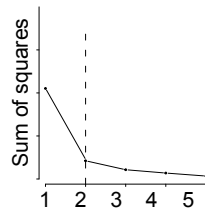

108 Wks

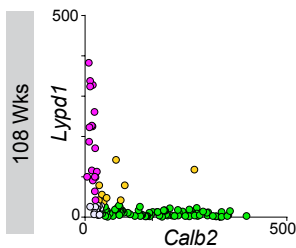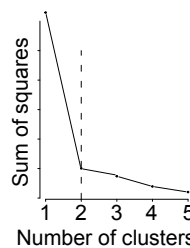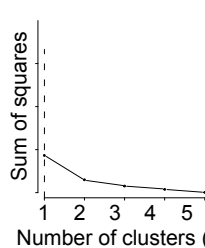

● *Lypd1*<sup>+</sup> *Calb2*<sup>-</sup>  
● *Calb2*<sup>+</sup> *Lypd1*<sup>-</sup>  
● *Lypd1*<sup>+</sup> *Calb2*<sup>+</sup>
