# Supplementary material
Source: PubMed Central journal article supplement (PMC6150604)

K<sup>+</sup> channels

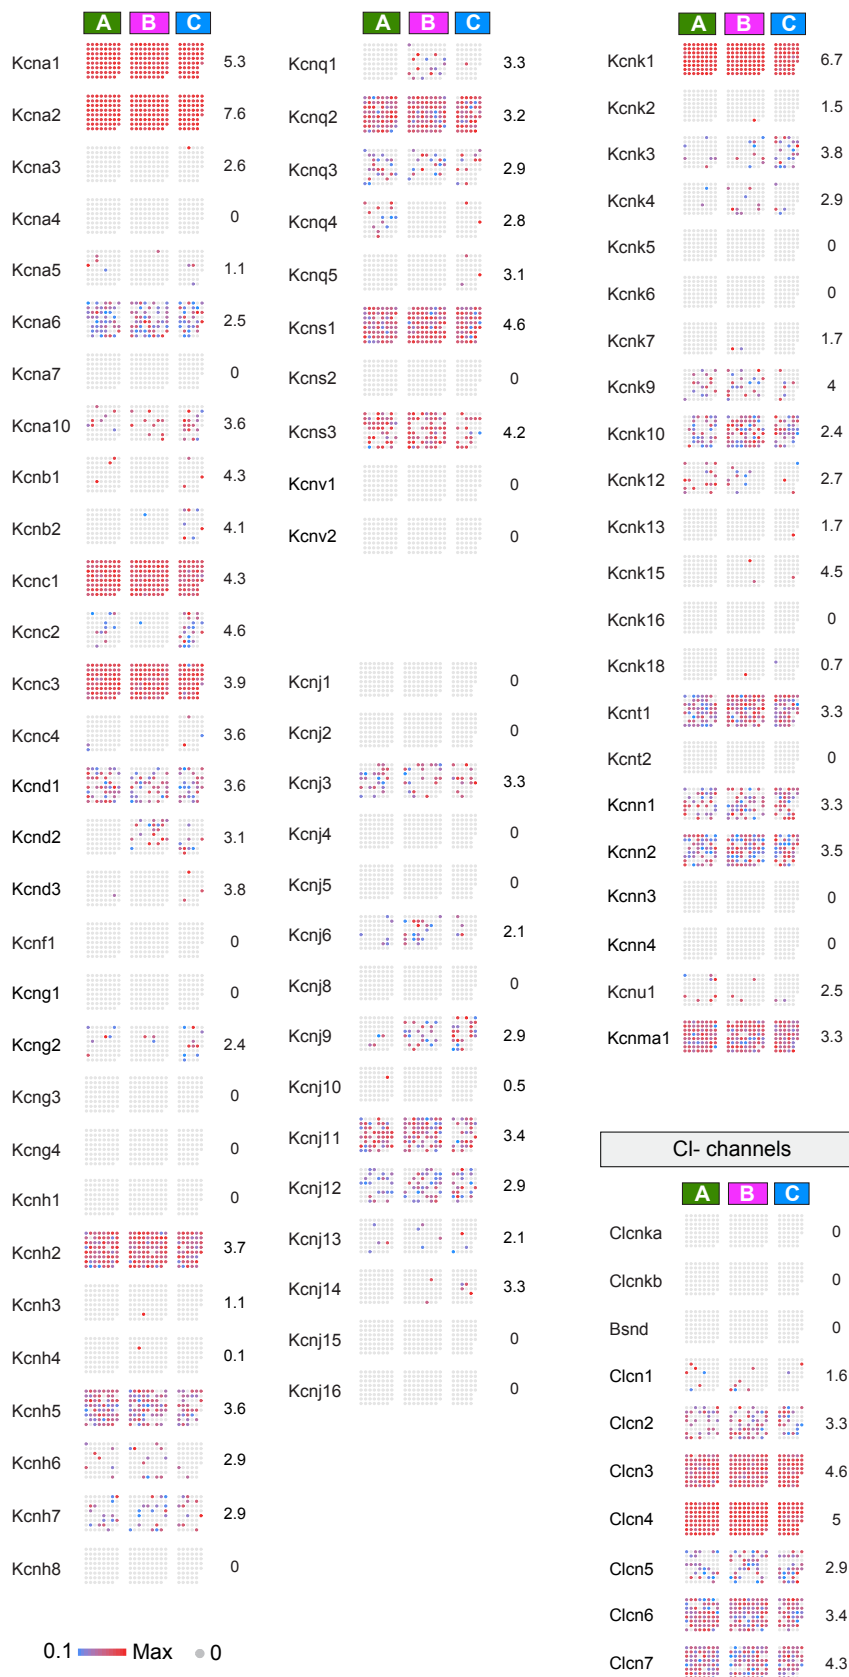

Cl<sup>-</sup> channels

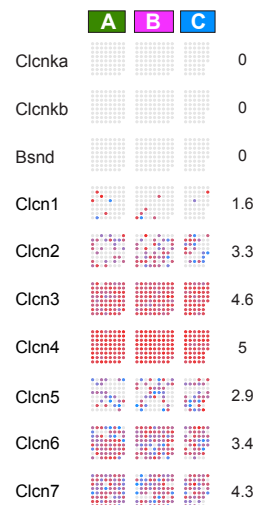

Ca<sup>2+</sup> channels

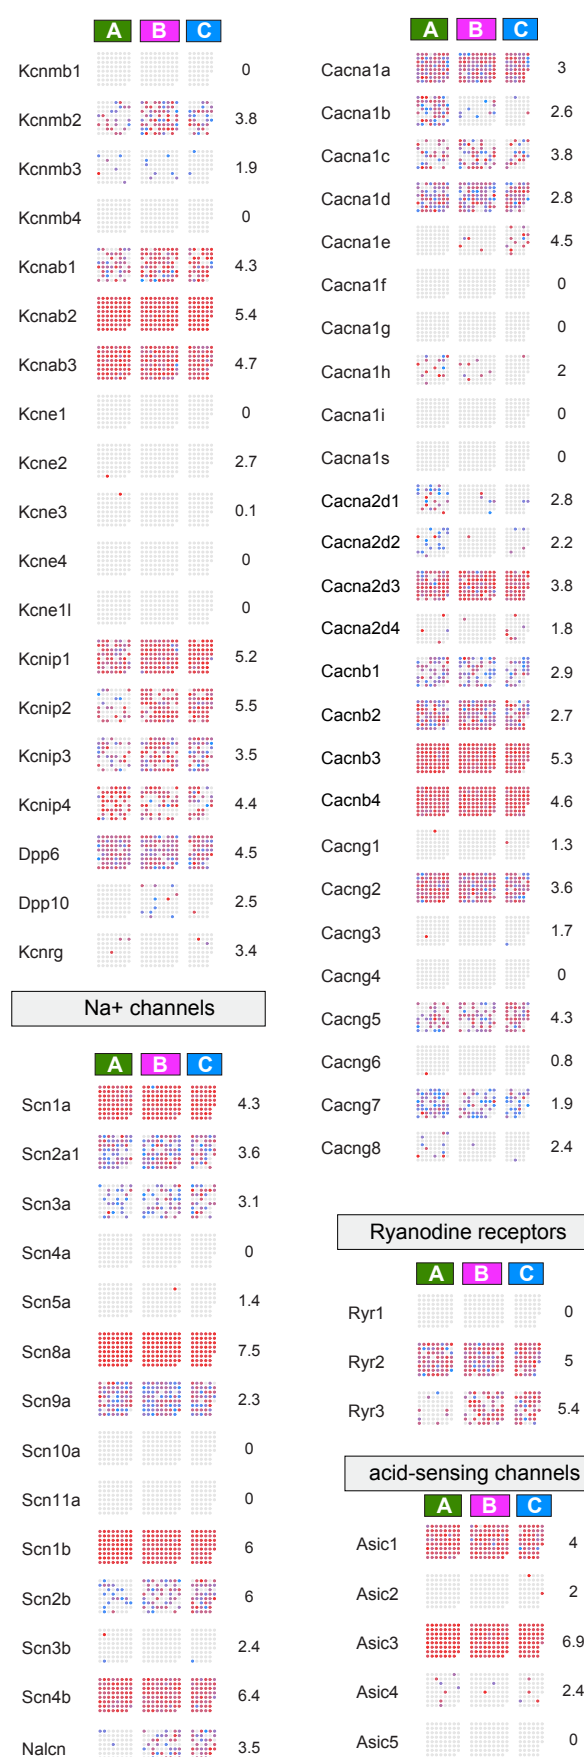

Supplement: NIHMS1502201-supplement-2.pdf [file NIHMS1502201-supplement-2.pdf]

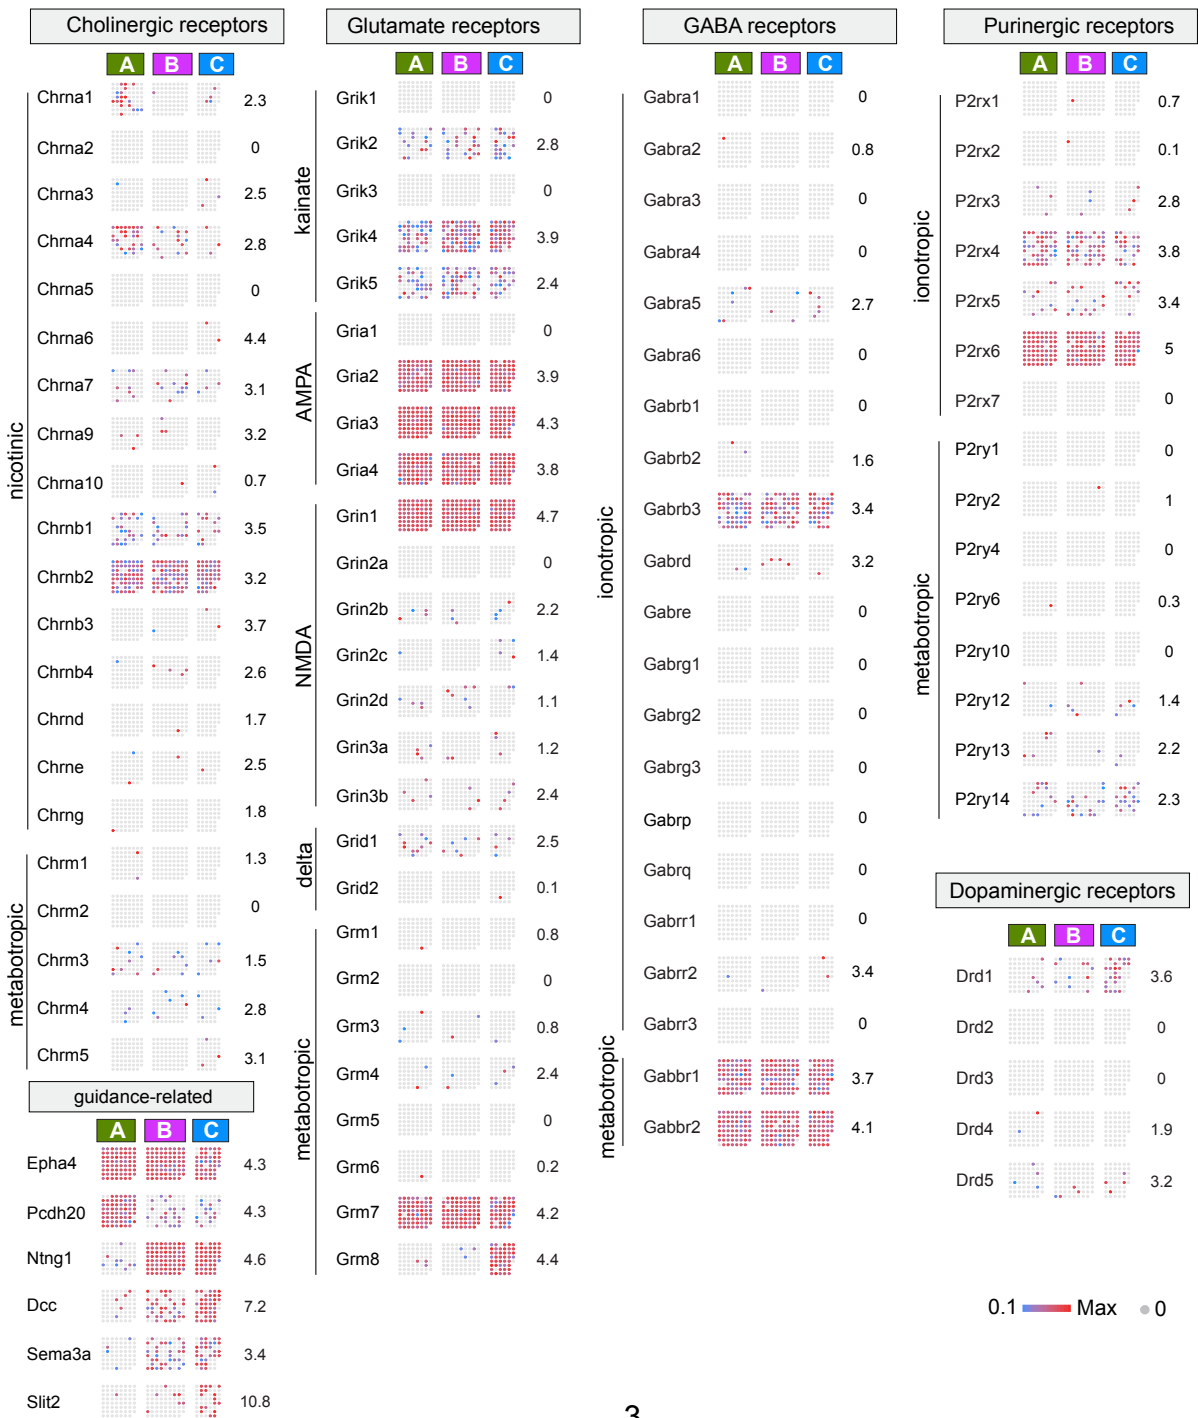

Supplement: NIHMS1502201-supplement-3.pdf [file NIHMS1502201-supplement-3.pdf]

A

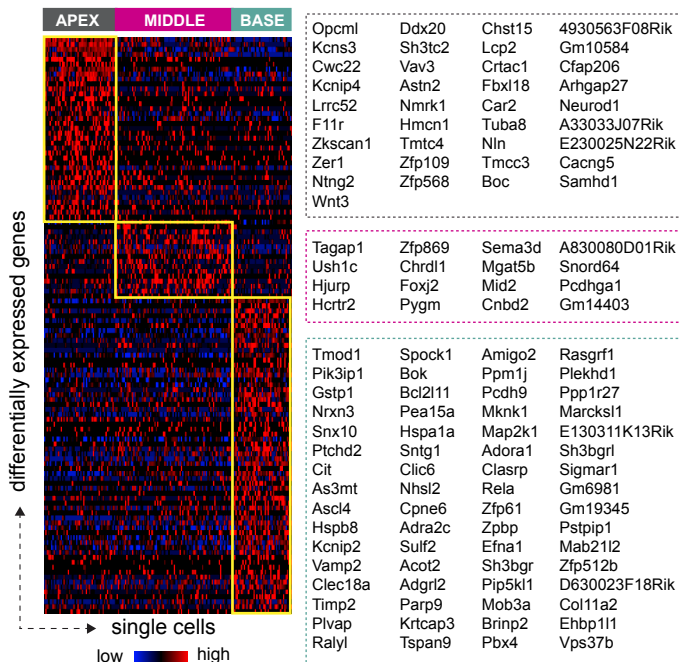

B

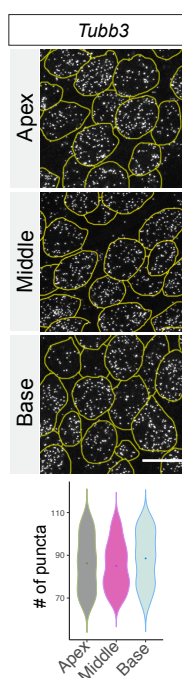

C

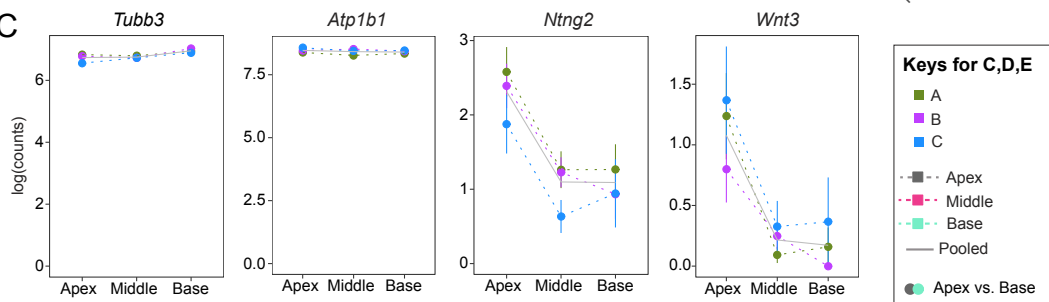

D

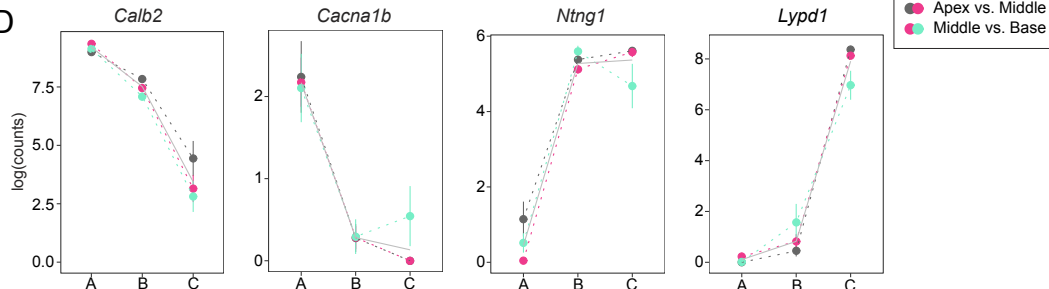

E

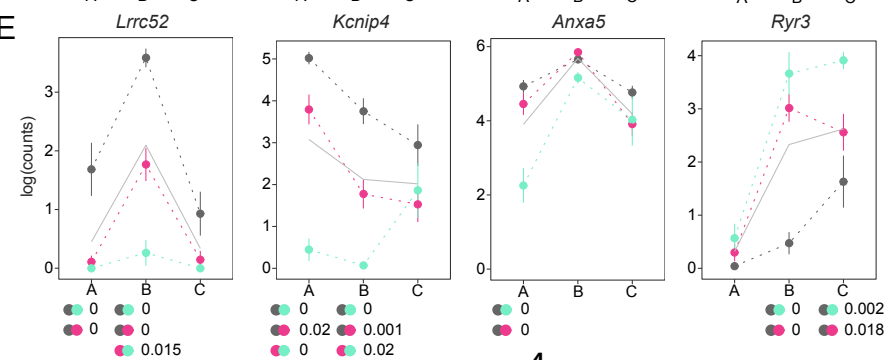

Supplement: NIHMS1502201-supplement-4.pdf [file NIHMS1502201-supplement-4.pdf]

# FIGURE S5

A

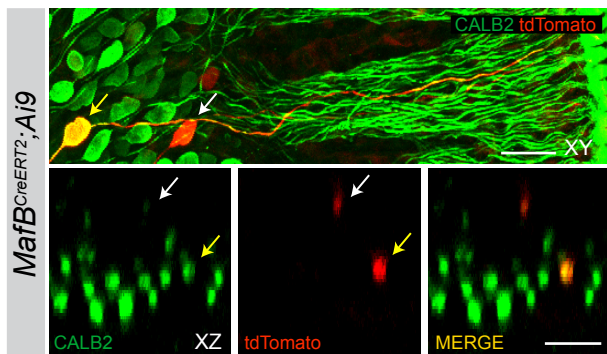

B

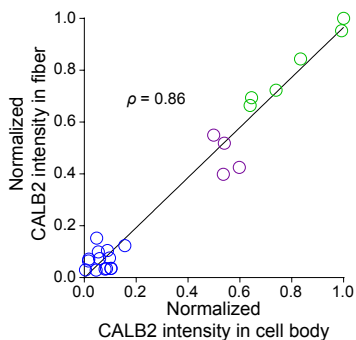

C

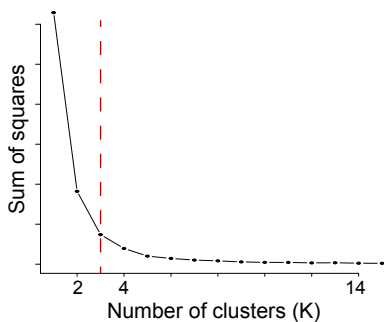

D

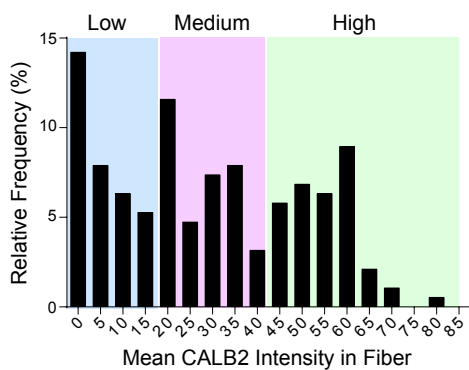

E

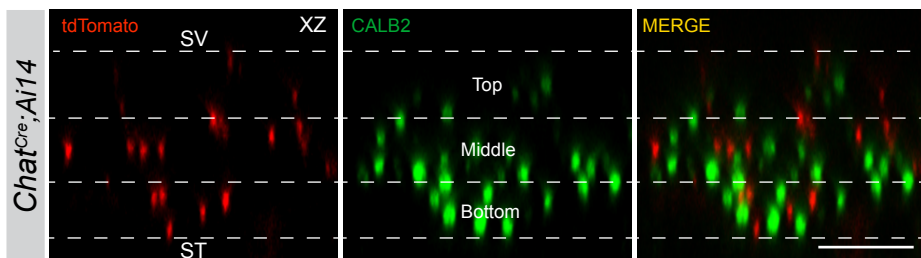

F

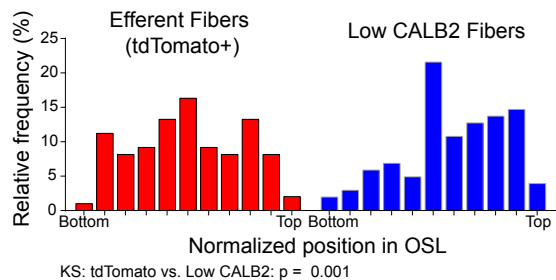

G

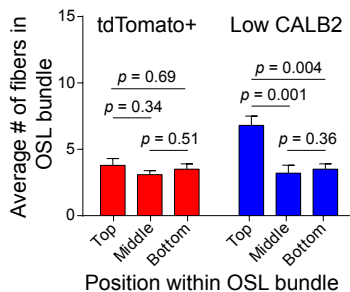

Supplement: NIHMS1502201-supplement-5.pdf [file NIHMS1502201-supplement-5.pdf]

# FIGURE S7

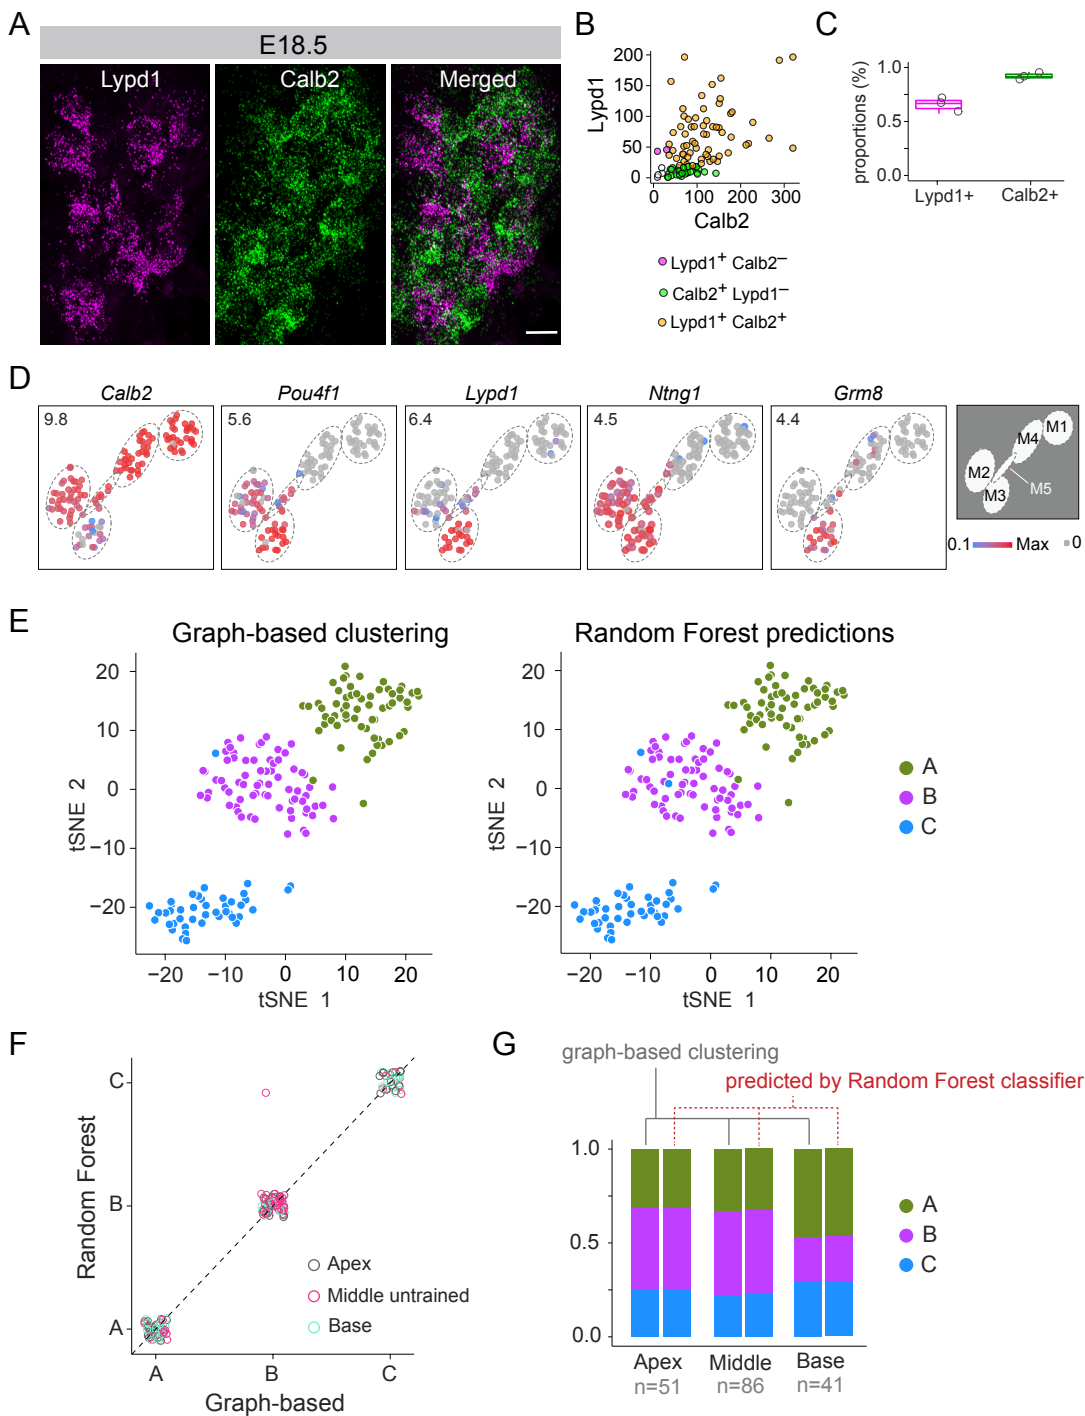

Supplement: NIHMS1502201-supplement-7.pdf [file NIHMS1502201-supplement-7.pdf]
